# Supplementary material
Source: Royal Society of Chemistry journal article supplement (doi:10.1039/d5cy01610j)
Supplement: d5cy01610j1.pdf [file d5cy01610j1.pdf]

## **Supplementary Information**

### **Engineering and optimising barium cerate-supported cobalt catalyst for ammonia synthesis**

Hubert Ronduda <sup>a\*</sup>, Małgorzata Lemańska <sup>a</sup>, Urszula Ulkowska <sup>a</sup>, Wojciech Patkowski <sup>a</sup>, Weronika Bulejak <sup>a</sup>, Andrzej Ostrowski <sup>a</sup>, Jacek Sikorski <sup>a</sup>, Kamil Sobczak <sup>b</sup>, Milena Ojrzyńska <sup>c</sup>, Dariusz Moszyński <sup>d</sup>, Wioletta Raróg-Pilecka <sup>a</sup>

<sup>a</sup> *Warsaw University of Technology, Faculty of Chemistry, Noakowskiego 3, 00-664 Warsaw, Poland*

<sup>b</sup> *University of Warsaw Biological and Chemical Research Centre, Żwirki i Wigury 101, 02-089 Warsaw, Poland*

<sup>c</sup> *Institute of Optoelectronics, Military University of Technology, Kaliskiego 2, 00-908 Warsaw, Poland*

<sup>d</sup> *West Pomeranian University of Technology in Szczecin, Faculty of Chemical Technology and Engineering, Department of Inorganic Chemical Technology and Environment Engineering, Piastów Ave. 42, 71-065 Szczecin, Poland*

\*Corresponding author

e-mail: [hubert.ronduda@pw.edu.pl](mailto:hubert.ronduda@pw.edu.pl)

tel. +48 22 234 7602

Number of pages: **11**

Number of figures: **13**

Number of tables: **10**

**Table S1.** Cobalt loadings in the catalysts determined by ICP-MS.

| Catalyst | Nominal Co content (wt%) | Experimental Co content (wt%) |
|----------|--------------------------|-------------------------------|
| 10Co-WI  | 10                       | 8.55 ± 0.51                   |
| 10Co-PM  | 10                       | 10.47 ± 0.19                  |
| 10Co-DP  | 10                       | 10.29 ± 0.78                  |
| 20Co-DP  | 20                       | 19.53 ± 0.57                  |
| 30Co-DP  | 30                       | 28.21 ± 0.49                  |
| 40Co-DP  | 40                       | 40.08 ± 0.89                  |
| 50Co-DP  | 50                       | 49.36 ± 2.58                  |

**Table S2.** Quantitative H<sub>2</sub>-TPD results of 10Co-DP, 10Co-WI, and 10Co-PM catalysts.

| Catalyst | H <sub>2</sub> chemisorption ( $\mu\text{mol g}_{\text{cat}}^{-1}$ ) |                 |                      | LT/HT ratio <sup>d</sup> |
|----------|----------------------------------------------------------------------|-----------------|----------------------|--------------------------|
|          | LT <sup>a</sup>                                                      | HT <sup>b</sup> | LT + HT <sup>c</sup> |                          |
| 10Co-DP  | 17.1                                                                 | 32.5            | 49.6                 | 0.53                     |
| 10Co-WI  | 26.4                                                                 | 46.1            | 72.5                 | 0.57                     |
| 10Co-PM  | 8.9                                                                  | 28.5            | 37.4                 | 0.31                     |

<sup>a</sup> H<sub>2</sub> desorption at low temperatures. <sup>b</sup> H<sub>2</sub> desorption at high temperatures. <sup>c</sup> Total H<sub>2</sub> desorption. <sup>d</sup> Ratio of the H<sub>2</sub> desorption at low temperature to the H<sub>2</sub> desorption at high temperature.

**Table S3.** Quantitative H<sub>2</sub>-TPD results of the xCo-DP and 30Co-WI catalysts reduced at 600 °C.

| Catalyst | H <sub>2</sub> chemisorption ( $\mu\text{mol g}_{\text{cat}}^{-1}$ ) |                 |                      | LT/HT ratio <sup>d</sup> |
|----------|----------------------------------------------------------------------|-----------------|----------------------|--------------------------|
|          | LT <sup>a</sup>                                                      | HT <sup>b</sup> | LT + HT <sup>c</sup> |                          |
| 10Co-DP  | 17.1                                                                 | 32.5            | 49.6                 | 0.53                     |
| 20Co-DP  | 26.2                                                                 | 45.0            | 71.2                 | 0.58                     |
| 30Co-DP  | 37.6                                                                 | 44.9            | 82.5                 | 0.84                     |
| 30Co-WI  | 24.9                                                                 | 40.5            | 65.4                 | 0.62                     |
| 40Co-DP  | 41.3                                                                 | 43.0            | 84.3                 | 0.96                     |
| 50Co-DP  | 41.0                                                                 | 38.5            | 79.5                 | 1.06                     |

<sup>a</sup> H<sub>2</sub> desorption at low temperatures. <sup>b</sup> H<sub>2</sub> desorption at high temperatures. <sup>c</sup> Total H<sub>2</sub> desorption. <sup>d</sup> Ratio of the H<sub>2</sub> desorption at low temperature to the H<sub>2</sub> desorption at high temperature.

**Table S4.** Comparison of the catalytic performance of different supported catalysts for NH<sub>3</sub> synthesis.

| Entry | Active metal                          | Catalyst                                                  | Metal content (wt%) | Temperature (°C) | Pressure (MPa) | GHSV (mL g <sub>cat</sub> <sup>-1</sup> h <sup>-1</sup> ) | NH <sub>3</sub> synthesis rate (mmol <sub>NH<sub>3</sub></sub> g <sub>cat</sub> <sup>-1</sup> h <sup>-1</sup> ) | Ref. |     |         |         |           |
|-------|---------------------------------------|-----------------------------------------------------------|---------------------|------------------|----------------|-----------------------------------------------------------|-----------------------------------------------------------------------------------------------------------------|------|-----|---------|---------|-----------|
| 1     | Fe                                    | Fe/K(3)/MgO                                               | 20                  | 350              | 1.0            | 72,000                                                    | 17.5                                                                                                            | [1]  |     |         |         |           |
| 2     |                                       | Fe/MgO                                                    |                     |                  |                |                                                           | 2.7                                                                                                             |      |     |         |         |           |
| 3     | Ru                                    | Ru/Pr <sub>2</sub> O <sub>3</sub>                         | 5                   | 390              | 0.9            | 18,000                                                    | 15.2                                                                                                            | [2]  |     |         |         |           |
| 4     |                                       | Ru/CeO <sub>2</sub>                                       |                     |                  |                |                                                           | 7.4                                                                                                             |      |     |         |         |           |
| 5     |                                       | Ru/MgO                                                    |                     |                  |                |                                                           | 1.5                                                                                                             |      |     |         |         |           |
| 6     |                                       | Ru/BaZrO <sub>3</sub>                                     |                     |                  |                |                                                           | 15.3                                                                                                            |      |     |         |         |           |
| 7     |                                       | Ru/MgO                                                    | 4                   | 400              | 3.0            | —                                                         | 8.4                                                                                                             | [3]  |     |         |         |           |
| 8     |                                       | Ru/CeO <sub>2</sub>                                       |                     |                  |                |                                                           | 8.4                                                                                                             |      |     |         |         |           |
| 9     |                                       | Co                                                        | Co/K(1)/MgO         | 20               | 400            | 1.0                                                       | 72,000                                                                                                          | 3.1  | [4] |         |         |           |
| 10    |                                       |                                                           | Co/K(3)/MgO         |                  |                |                                                           |                                                                                                                 | 2.7  |     |         |         |           |
| 11    | Co/MgO                                |                                                           | 1.6                 |                  |                |                                                           |                                                                                                                 |      |     |         |         |           |
| 12    | Co/Ba/La <sub>2</sub> O <sub>3</sub>  |                                                           | 20                  | 350              | 1.0            | 72,000                                                    | 19.3                                                                                                            | [5]  |     |         |         |           |
| 13    | Co/La <sub>2</sub> O <sub>3</sub>     |                                                           |                     |                  |                |                                                           | 2.8                                                                                                             |      |     |         |         |           |
| 14    | Co/La <sub>2</sub> O <sub>3</sub>     |                                                           | 10                  | 470              | 6.3            | 140,000                                                   | 47.0                                                                                                            | [6]  |     |         |         |           |
| 15    | CoNd <sub>2</sub> O <sub>3</sub>      |                                                           |                     |                  |                |                                                           | 17.6                                                                                                            |      |     |         |         |           |
| 16    | Co/Sm <sub>2</sub> O <sub>3</sub>     |                                                           |                     |                  |                |                                                           | 8.2                                                                                                             |      |     |         |         |           |
| 17    | Co/Eu <sub>2</sub> O <sub>3</sub>     |                                                           |                     |                  |                |                                                           | 10.6                                                                                                            |      |     |         |         |           |
| 18    | Co/Gd <sub>2</sub> O <sub>3</sub>     |                                                           |                     |                  |                |                                                           | 10.6                                                                                                            |      |     |         |         |           |
| 19    |                                       |                                                           |                     |                  |                |                                                           | 45.8                                                                                                            |      |     |         |         |           |
| 20    |                                       |                                                           |                     |                  |                |                                                           | 63.7                                                                                                            |      |     |         |         |           |
| 21    | Co/MgO–La <sub>2</sub> O <sub>3</sub> |                                                           |                     |                  |                |                                                           | 30                                                                                                              |      | 470 | 6.3     | 140,000 | 83.6      |
| 22    |                                       |                                                           | 40                  |                  |                |                                                           | 108.8                                                                                                           |      |     |         |         |           |
| 23    |                                       |                                                           | 50                  |                  |                |                                                           | 105.4                                                                                                           |      |     |         |         |           |
| 24    | Co/Nd <sub>2</sub> O <sub>3</sub>     |                                                           |                     | 10               | 470            | 6.3                                                       | 140,000                                                                                                         | 59.3 | [8] |         |         |           |
| 25    |                                       |                                                           | 20                  | 81.6             |                |                                                           |                                                                                                                 |      |     |         |         |           |
| 26    |                                       |                                                           | 30                  | 74.6             |                |                                                           |                                                                                                                 |      |     |         |         |           |
| 27    |                                       |                                                           | 40                  | 83.4             |                |                                                           |                                                                                                                 |      |     |         |         |           |
| 28    |                                       |                                                           | 50                  | 106.9            |                |                                                           |                                                                                                                 |      |     |         |         |           |
| 29    |                                       |                                                           | 10                  | 91.7             |                |                                                           |                                                                                                                 |      |     |         |         |           |
| 30    |                                       |                                                           | 20                  | 182.0            |                |                                                           |                                                                                                                 |      |     |         |         |           |
| 31    |                                       | Co/BaCe <sub>0.9</sub> Sm <sub>0.1</sub> O <sub>3-δ</sub> | 30                  | 470              |                |                                                           |                                                                                                                 | 6.3  |     | 140,000 | 235.7   | This work |
| 32    |                                       |                                                           | 40                  |                  |                |                                                           |                                                                                                                 |      |     |         | 281.7   |           |
| 33    |                                       |                                                           | 50                  |                  |                |                                                           |                                                                                                                 |      |     |         | 262.7   |           |

\* Dash (—) indicates no data.

**Table S5.** Comparison of the performance of the cobalt catalyst with the industrial KM1R catalyst for NH<sub>3</sub> synthesis.

| Catalyst                                                  | Metal content (wt%) | Pressure (MPa) | Temperature (°C) | GHSV (mL g <sub>cat</sub> <sup>-1</sup> h <sup>-1</sup> ) | NH <sub>3</sub> synthesis rate                                                |                                                                                 | Ref.      |
|-----------------------------------------------------------|---------------------|----------------|------------------|-----------------------------------------------------------|-------------------------------------------------------------------------------|---------------------------------------------------------------------------------|-----------|
|                                                           |                     |                |                  |                                                           | mmol <sub>NH<sub>3</sub></sub> g <sub>cat</sub> <sup>-1</sup> h <sup>-1</sup> | mmol <sub>NH<sub>3</sub></sub> g <sub>metal</sub> <sup>-1</sup> h <sup>-1</sup> |           |
| Industrial Fe catalyst (KM1R) <sup>a</sup>                | 94                  | 10             | 400              | ~80,000                                                   | 158.0                                                                         | 168.1                                                                           | [9]       |
| Co/BaCe <sub>0.9</sub> Sm <sub>0.1</sub> O <sub>3-δ</sub> | 40                  | 6.3            | 400              | 140,000                                                   | 115.8                                                                         | 288.9                                                                           | This work |

<sup>a</sup> KM1R is a triply promoted iron catalyst containing ~2.8% CaO, 0.60% K<sub>2</sub>O, 2.5% Al<sub>2</sub>O<sub>3</sub>, and 94% Fe.

**Table S6.** Peak maximum temperatures and hydrogen consumptions from H<sub>2</sub>-TPR analyses for xCo-DP.

| Sample  | Peak maximum temperature (°C) |         | Hydrogen consumption (cm <sup>3</sup> g <sup>-1</sup> ) |         |       | Co loading (wt%) <sup>a</sup> |
|---------|-------------------------------|---------|---------------------------------------------------------|---------|-------|-------------------------------|
|         | Peak I                        | Peak II | Peak I                                                  | Peak II | Total |                               |
| 10Co-DP | 299                           | 387     | 0.5                                                     | 1.6     | 2.1   | 9.5                           |
| 20Co-DP | 307                           | 383     | 1.0                                                     | 3.2     | 4.2   | 20.1                          |
| 30Co-DP | 316                           | 456     | 1.4                                                     | 4.6     | 6.0   | 29.7                          |
| 40Co-DP | 318                           | 459     | 1.9                                                     | 6.3     | 8.2   | 42.7                          |
| 50Co-DP | 323                           | 465     | 2.2                                                     | 7.4     | 9.6   | 51.1                          |

<sup>a</sup> Co loading in the catalysts.

**Table S7.** Mass losses and mass gains during the reduction and oxidation processes of xCo-DP.

| Sample  | Mass loss during the reduction step (%) | Mass gain during the oxidation step (%) | Co loading (wt%) <sup>a</sup> |
|---------|-----------------------------------------|-----------------------------------------|-------------------------------|
| 10Co-DP | 5.2                                     | 3.5                                     | 10.1                          |
| 20Co-DP | 9.0                                     | 6.7                                     | 20.1                          |
| 30Co-DP | 12.1                                    | 9.5                                     | 30.3                          |
| 40Co-DP | 15.3                                    | 12.4                                    | 41.3                          |
| 50Co-DP | 18.3                                    | 15.3                                    | 52.5                          |

<sup>a</sup> Co loading in the catalysts. Calculated based on the mass gain during the oxidation step.

**Table S8.** Quantitative H<sub>2</sub>-TPD results of the xCo-DP catalysts reduced at 550 °C.

| Catalyst | H <sub>2</sub> chemisorption (μmol g <sub>cat</sub> <sup>-1</sup> ) |                 |                      | LT/HT ratio <sup>d</sup> |
|----------|---------------------------------------------------------------------|-----------------|----------------------|--------------------------|
|          | LT <sup>a</sup>                                                     | HT <sup>b</sup> | LT + HT <sup>c</sup> |                          |
| 10Co-DP  | 18.3                                                                | 31.5            | 49.8                 | 0.58                     |
| 20Co-DP  | 35.3                                                                | 37.8            | 73.1                 | 0.93                     |
| 30Co-DP  | 50.7                                                                | 33.2            | 83.9                 | 1.53                     |
| 40Co-DP  | 55.0                                                                | 34.9            | 89.9                 | 1.58                     |
| 50Co-DP  | 51.4                                                                | 35.7            | 87.1                 | 1.44                     |

<sup>a</sup> H<sub>2</sub> desorption at low temperatures. <sup>b</sup> H<sub>2</sub> desorption at high temperatures. <sup>c</sup> Total H<sub>2</sub> desorption. <sup>d</sup> Ratio of the H<sub>2</sub> desorption at low temperature to the H<sub>2</sub> desorption at high temperature.

**Table S9.** Effect of catalyst reduction temperature on the NH<sub>3</sub> synthesis performance over the xCo-DP catalysts.

| Catalyst | Ammonia synthesis rate <sup>a</sup> (g <sub>NH<sub>3</sub></sub> g <sub>cat</sub> <sup>-1</sup> h <sup>-1</sup> ) |                             |
|----------|-------------------------------------------------------------------------------------------------------------------|-----------------------------|
|          | Catalysts reduced at 550 °C                                                                                       | Catalysts reduced at 600 °C |
| 10Co-DP  | 1.41                                                                                                              | 1.56                        |
| 20Co-DP  | 2.83                                                                                                              | 3.10                        |
| 30Co-DP  | 3.73                                                                                                              | 4.01                        |
| 40Co-DP  | 4.44                                                                                                              | 4.80                        |
| 50Co-DP  | 4.12                                                                                                              | 4.47                        |

<sup>a</sup> Reaction conditions: pressure, 6.3 MPa; temperature, 470 °C; synthesis gas, H<sub>2</sub>/N<sub>2</sub> = 3 with a flow rate of 70 L h<sup>-1</sup>.

**Table S10.** Quantitative N<sub>2</sub>-TPD results of the xCo-DP catalysts reduced at 600 °C.

| Catalyst | N <sub>2</sub> chemisorption ( $\mu\text{mol g}_{\text{cat}}^{-1}$ ) <sup>a</sup> |
|----------|-----------------------------------------------------------------------------------|
| 10Co-DP  | 5.8                                                                               |
| 20Co-DP  | 11.2                                                                              |
| 30Co-DP  | 12.9                                                                              |
| 40Co-DP  | 15.0                                                                              |
| 50Co-DP  | 14.4                                                                              |

<sup>a</sup> Total N<sub>2</sub> desorption.

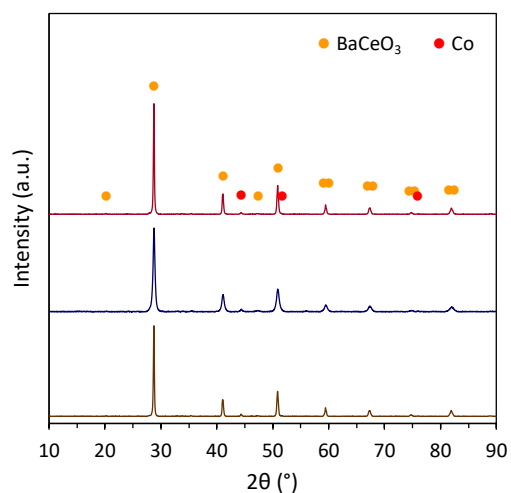

**Figure S1.** XRD patterns of the 10Co-DP, 10Co-WI and 10Co-PM catalysts. The orange dot (●) indicates BaCeO<sub>3</sub>, and the red dot (●) indicates fcc-Co.

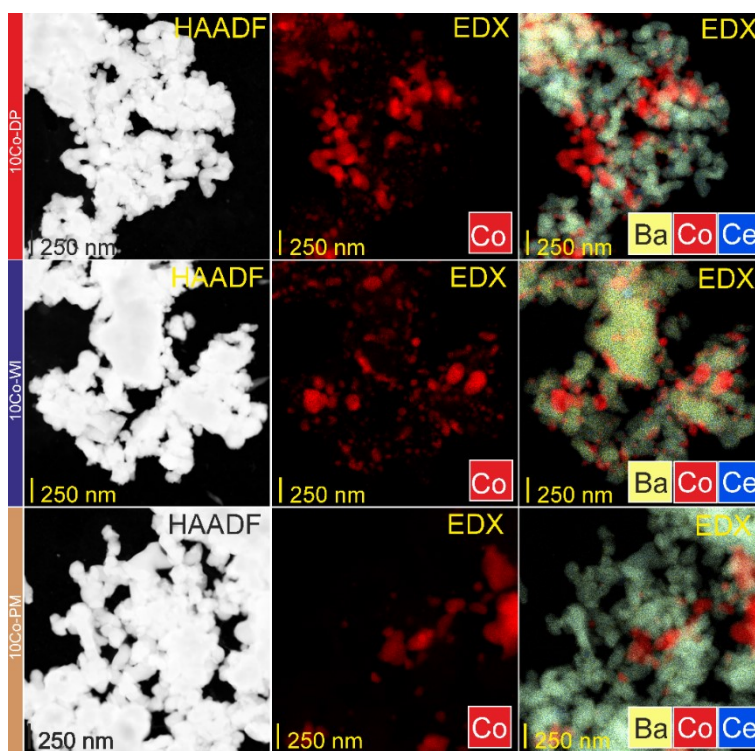

**Figure S2.** HAADF-STEM image and corresponding EDX maps of the 10Co-DP, 10Co-WI and 10Co-PM catalysts.

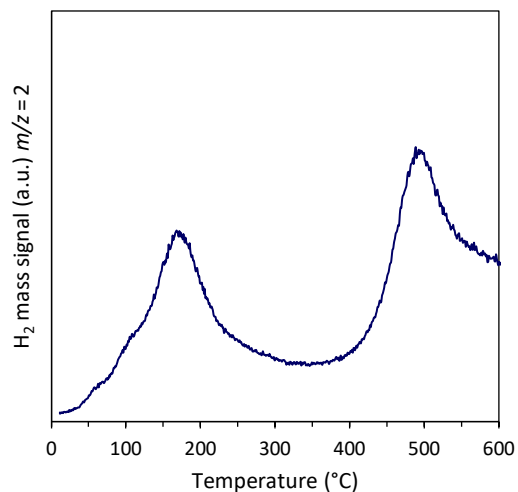

**Figure S3.** H<sub>2</sub>-TPD analysis of the 30Co-WI catalyst reduced at 600 °C.

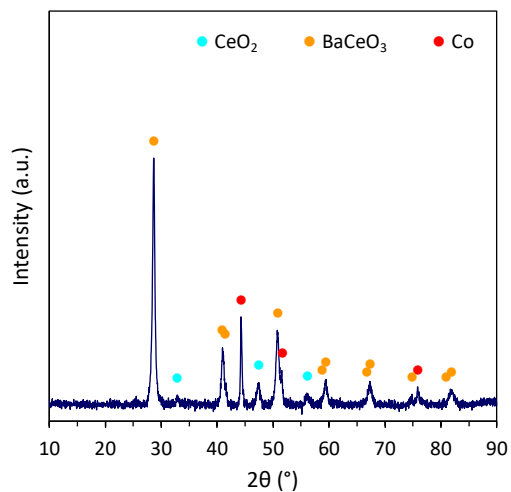

**Figure S4.** XRD pattern of the 30Co-WI catalyst. The turquoise dot (●) indicates CeO<sub>2</sub>, the orange dot (●) indicates BaCeO<sub>3</sub>, and the red dot (●) indicates fcc-Co.

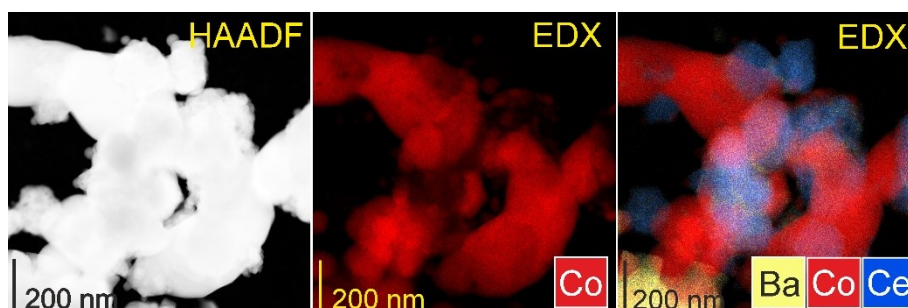

**Figure S5.** HAADF-STEM image and corresponding EDX maps of the 30Co-WI catalyst.

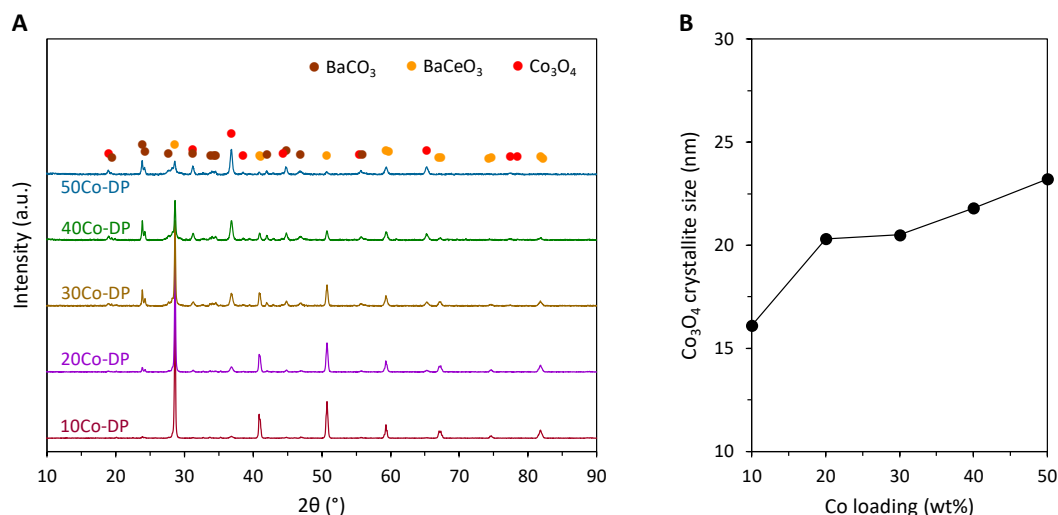

**Figure S6.** (A) XRD patterns of the xCo-DP pre-catalysts. The brown dot (●) indicates BaCO<sub>3</sub>, the orange dot (●) indicates BaCeO<sub>3</sub>, and the red dot (●) indicates Co<sub>3</sub>O<sub>4</sub>. (B) The dependence of Co loadings on the size of Co<sub>3</sub>O<sub>4</sub> crystallites. The Co<sub>3</sub>O<sub>4</sub> crystallite size was determined from the (311) reflection. For all the pre-catalysts, the diffraction peaks attributable to BaCeO<sub>3</sub> in the *Pm**cn* space group were clearly visible. There were also peaks related to the Co<sub>3</sub>O<sub>4</sub> phase (PDF 74-1656), and minor diffraction peaks assignable to BaCO<sub>3</sub>. The Co<sub>3</sub>O<sub>4</sub> crystallite size increased with increasing Co loading, from 16 nm for 10 wt% Co to 23 nm for 50 wt% Co.

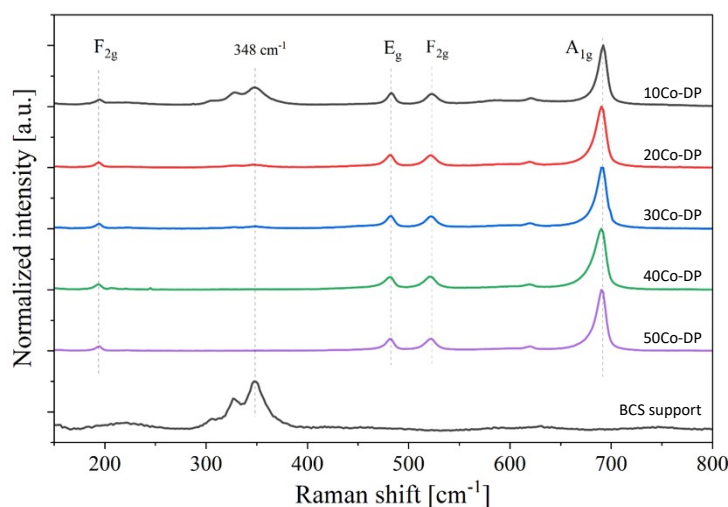

**Figure S7.** Raman spectra of the BCS support and xCo-DP pre-catalyst. Averaged Raman spectra were collected from 400 points on the surface for the pre-catalysts with varying Co loadings, with the characteristic F<sub>2g</sub>, E<sub>g</sub>, and A<sub>1g</sub> vibrational modes marked. All the pre-catalysts exhibited the characteristic Raman modes of Co<sub>3</sub>O<sub>4</sub> [10,11]: the F<sub>2g</sub> mode at ~190 cm<sup>-1</sup>, the E<sub>g</sub> and F<sub>2g</sub> modes in the 450–520 cm<sup>-1</sup> region, and the dominant A<sub>1g</sub> mode located around ~690–700 cm<sup>-1</sup>. In comparison with the literature data [10], the bands are shifted by approximately 10–20 cm<sup>-1</sup> towards higher wavenumbers. The peak at 690–700 cm<sup>-1</sup> corresponds to CoO<sub>6</sub> vibrations of the octahedral sites (A<sub>1g</sub>), whereas the peak at 190 cm<sup>-1</sup> is associated with CoO<sub>4</sub> vibrations of the tetrahedral sites (F<sub>2g</sub>). No significant changes are observed in the Raman modes; their positions and shapes remain essentially unchanged across Co loadings. On the contrary, distinct differences were evident in the Raman modes related to the BCS support. As the Co loading increased, the support features, two modes at 327 cm<sup>-1</sup> and 348.2 cm<sup>-1</sup>, gradually diminished and eventually disappeared. In the averaged spectra, the substrate modes remained visible for the 10Co-DP, 20Co-DP, and 30Co-DP pre-catalysts, but disappeared as the Co loading increased further, indicating a more complete surface coverage by cobalt oxide.

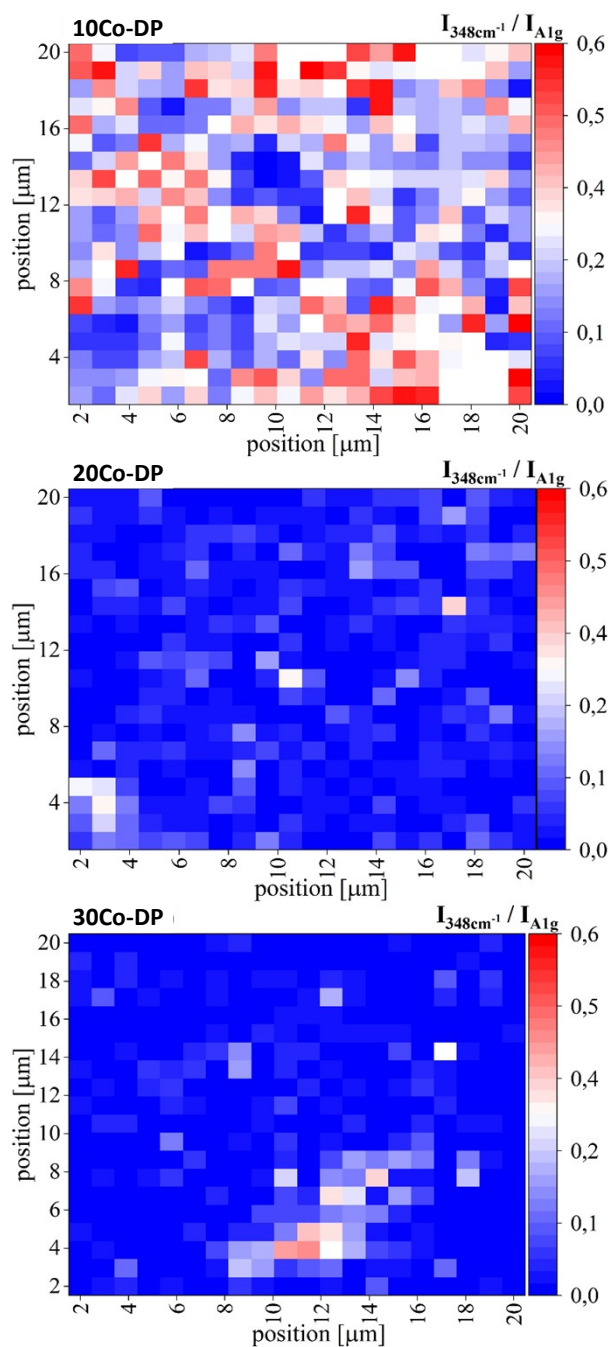

**Figure S8.** Raman intensity maps showing the spatial distribution of the  $I_{348\text{cm}^{-1}} / I_{A_{1g}}$  ratio for the xCo-DP (x = 10, 20, and 30) pre-catalysts. Higher values of the ratio indicate a stronger contribution of the  $348\text{ cm}^{-1}$  mode of BCS support relative to the  $A_{1g}$  mode of  $\text{Co}_3\text{O}_4$ . Each map reflects the relative contribution of the  $348\text{ cm}^{-1}$  mode related to support compared to the  $A_{1g}$  mode of  $\text{Co}_3\text{O}_4$  at each measurement point, with spectra collected every  $1\ \mu\text{m}$  across the surface. The 10Co-DP map exhibited strong spatial variability, with numerous red and white regions indicating a high relative intensity of the  $348\text{ cm}^{-1}$  mode of BCS support. This suggests that at low cobalt loading, the support signal remains clearly detectable. For 20Co-DP, the map becomes significantly more homogeneous and predominantly blue, showing that the contribution of the support-related mode is much weaker across most of the surface. Only a few isolated spots displayed locally elevated support-related intensity. This behaviour indicates a more continuous cobalt(II,III) oxide distribution compared to 10Co-DP. The 30Co-DP map shows an even stronger suppression of the support signal, with the majority of the area appearing deep blue. Only small, localised regions exhibit a noticeable signal contribution of support. This aligns

with the averaged Raman spectra, in which the support modes remained faintly visible up to a 30 wt% Co loading but were already significantly reduced (Figure S7).

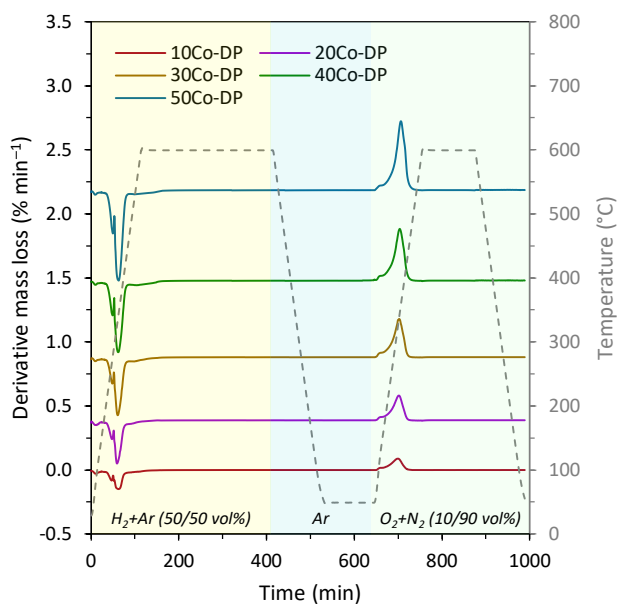

Figure S9. DTG analyses of the xCo-DP pre-catalysts.

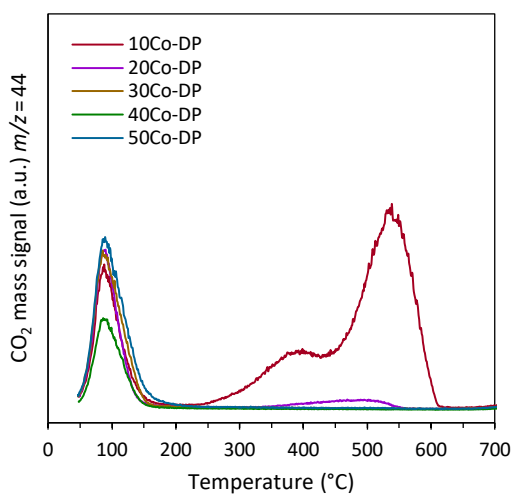

Figure S10. CO<sub>2</sub>-TPD profiles of xCo-DP catalysts.

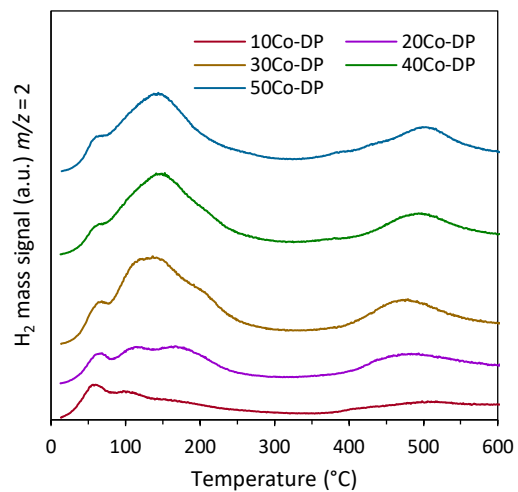

**Figure S11.** H<sub>2</sub>-TPD analyses of the xCo-DP catalysts reduced at 550 °C.

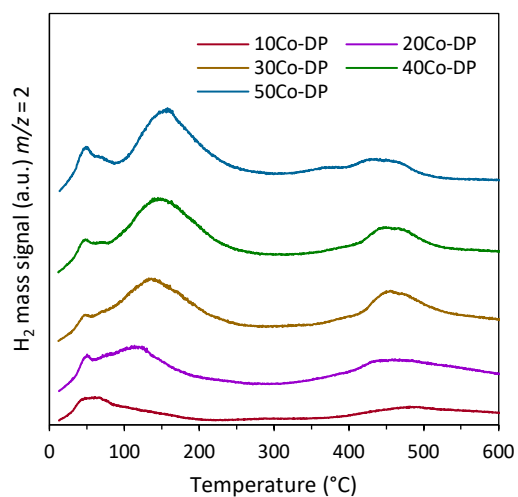

**Figure S12.** H<sub>2</sub>-TPD analyses of the xCo-DP spent catalysts (after ammonia synthesis reaction).

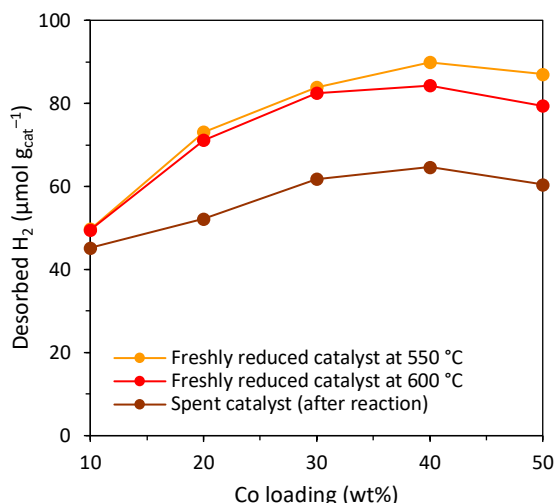

**Figure S13.** Dependence of H<sub>2</sub> desorption from H<sub>2</sub>-TPD analyses on Co loading for the freshly reduced and spent xCo-DP catalysts.

## References

- [1] K. Era et al., Catalytic Behavior of K-doped Fe/MgO Catalysts for Ammonia Synthesis Under Mild Reaction Conditions, *ChemSusChem*, 2023, **16**, e202300942. <https://doi.org/10.1002/cssc.202300942>
- [2] K. Sato et al., A low-crystalline ruthenium nano-layer supported on praseodymium oxide as an active catalyst for ammonia synthesis, *Chem. Sci.*, 2017, **8**, 674-679. <https://doi.org/10.1039/C6SC02382G>
- [3] Z. Wang et al., Highly effective perovskite-type BaZrO<sub>3</sub> supported Ru catalyst for ammonia synthesis, *Appl. Catal. A Gen.*, 2013, **458**, 130–136. <https://doi.org/10.1016/j.apcata.2013.03.037>
- [4] T. Shibata et al., Effect of Potassium Doping on the Surface Structure and Ammonia Synthesis Activity of Co/MgO, *ACS Omega*, 2025, **10**, 53113–53121. <https://doi.org/10.1021/acsomega.5c07671>
- [5] S.-i. Miyahara et al., Co Nanoparticle Catalysts Encapsulated by BaO–La<sub>2</sub>O<sub>3</sub> Nanofractions for Efficient Ammonia Synthesis Under Mild Reaction Conditions, *ACS Omega*, 2022, **7**, 24452–24460. <https://doi.org/10.1021/acsomega.2c01973>
- [6] W. Patkowski et al., Toward Green ammonia synthesis – exploring the influence of lanthanide oxides as supports on the cobalt catalysts properties, *J. CO<sub>2</sub> Util.*, 2024, **80**, 102699. <https://doi.org/10.1016/j.jcou.2024.102699>
- [7] H. Ronduda et al., On the effect of metal loading on the performance of Co catalysts supported on mixed MgO–La<sub>2</sub>O<sub>3</sub> oxides for ammonia synthesis, *RSC Adv.*, 2022, **12**, 33876–33888. <https://doi.org/10.1039/D2RA06053A>
- [8] W. Patkowski et al., The Influence of Active Phase Content on Properties and Activity of Nd<sub>2</sub>O<sub>3</sub>-Supported Cobalt Catalysts for Ammonia Synthesis, *Catalysts* 2023, **13**, 405. <https://doi.org/10.3390/catal13020405>
- [9] J. Sehested et al., Ammonia Synthesis over a Multipromoted Iron Catalyst: Extended Set of Activity Measurements, Microkinetic Model, and Hydrogen Inhibition, *J. Catal.*, 1999, **188**, 83–89. <https://doi.org/10.1006/jcat.1999.2628>
- [10] M. Wu et al., Investigation of synergistic effects and high performance of La-Co composite oxides for toluene catalytic oxidation at low temperature. *Environ. Sci. Pollut. Res.*, 2019, **26**, 12123–12135. <https://doi.org/10.1007/s11356-019-04672-7>
- [11] Y. Zheng et al., Complete combustion of methane over Co<sub>3</sub>O<sub>4</sub> catalysts: Influence of pH values, *J. Alloys Compd.*, 2018, **734**, 112–120. <https://doi.org/10.1016/j.jallcom.2017.11.008>
